# Supplementary material for: The differentiation of ROR-γt expressing iNKT17 cells is orchestrated by Runx1
Source: PubMed Central journal article supplement (PMC5539328; doi:10.1038/s41598-017-07365-8), 2017-08-01
Supplement: 41598_2017_7365_MOESM1_ESM.pdf [file 41598_2017_7365_MOESM1_ESM.pdf]

**Supplemental Information:**

**The differentiation of ROR- $\gamma$ t expressing iNKT17 cells  
is orchestrated by Runx1**

Puspa Thapa<sup>1</sup>, Bryce Manso<sup>1</sup>, Ji Young Chung<sup>1</sup>, Sinibaldo Romero Arocha<sup>1</sup>, Hai-Hui Xue<sup>2</sup>, Derek B. Sant' Angelo<sup>3</sup> and Virginia Smith Shapiro<sup>1\*</sup>

<sup>1</sup>Department of Immunology, Mayo Clinic, College of Medicine, 200 1<sup>st</sup> Street SW, Rochester, MN 55905

<sup>2</sup>Department of Microbiology and Immunology, University of Iowa, 51 Newton Rd Iowa City, IA, 52242

<sup>3</sup>Department of Pediatrics, Rutgers Robert Wood Johnson Medical School and The Children's Health Institute of New Jersey, 89 French Street, New Brunswick, NJ 08901

\*To whom correspondence should be addressed:

Virginia Smith Shapiro Ph.D.  
200 1<sup>st</sup> Street SW  
Rochester, MN 55905  
Phone: 507-293-0615  
Email: shapiro.virginia1@mayo.edu

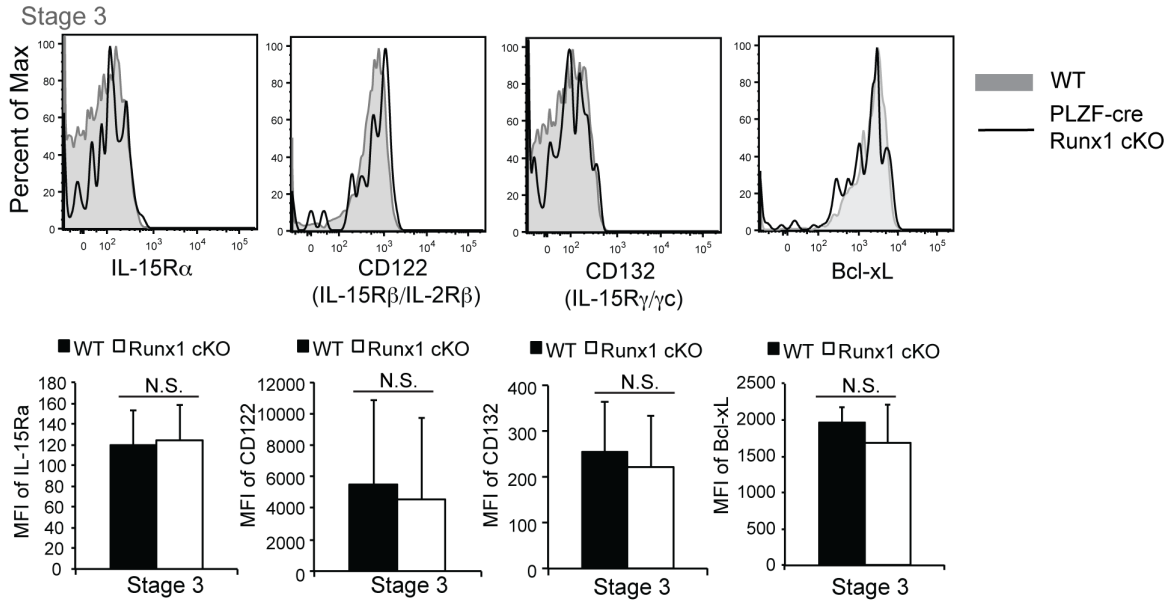

**Supplemental Figure 1: Runx1-deficient Stage 3 iNKT cells have normal expression of IL-15R and Bcl-xL.**

(a) Expression of IL-15 receptor subunits: IL-15R $\alpha$ , IL-15R $\beta$  (IL-2R $\beta$ , CD122), IL-15R $\gamma$  ( $\gamma$ c, CD132), and pro-survival gene Bcl-xL in Stage 3 iNKT cells of WT (grey filled) and PLZF-cre Hdac3 cKO (black line) mice. Data is representative of at least 3 mice/genotype from 3 independent experiments. Quantification of MFI for IL-15R $\alpha$ , IL-15R $\beta$  (IL-2R $\beta$ , CD122), IL-15R $\gamma$  ( $\gamma$ c, CD132), and Bcl-xL in Stage 3 iNKT cells of WT (black bar) and PLZF-cre Hdac3 cKO (white bar) mice. Data is calculated from at least 3 mice/genotype from 3 independent experiments. All statistical analysis was done using Student's *t-test*. Means  $\pm$  S.E.M.

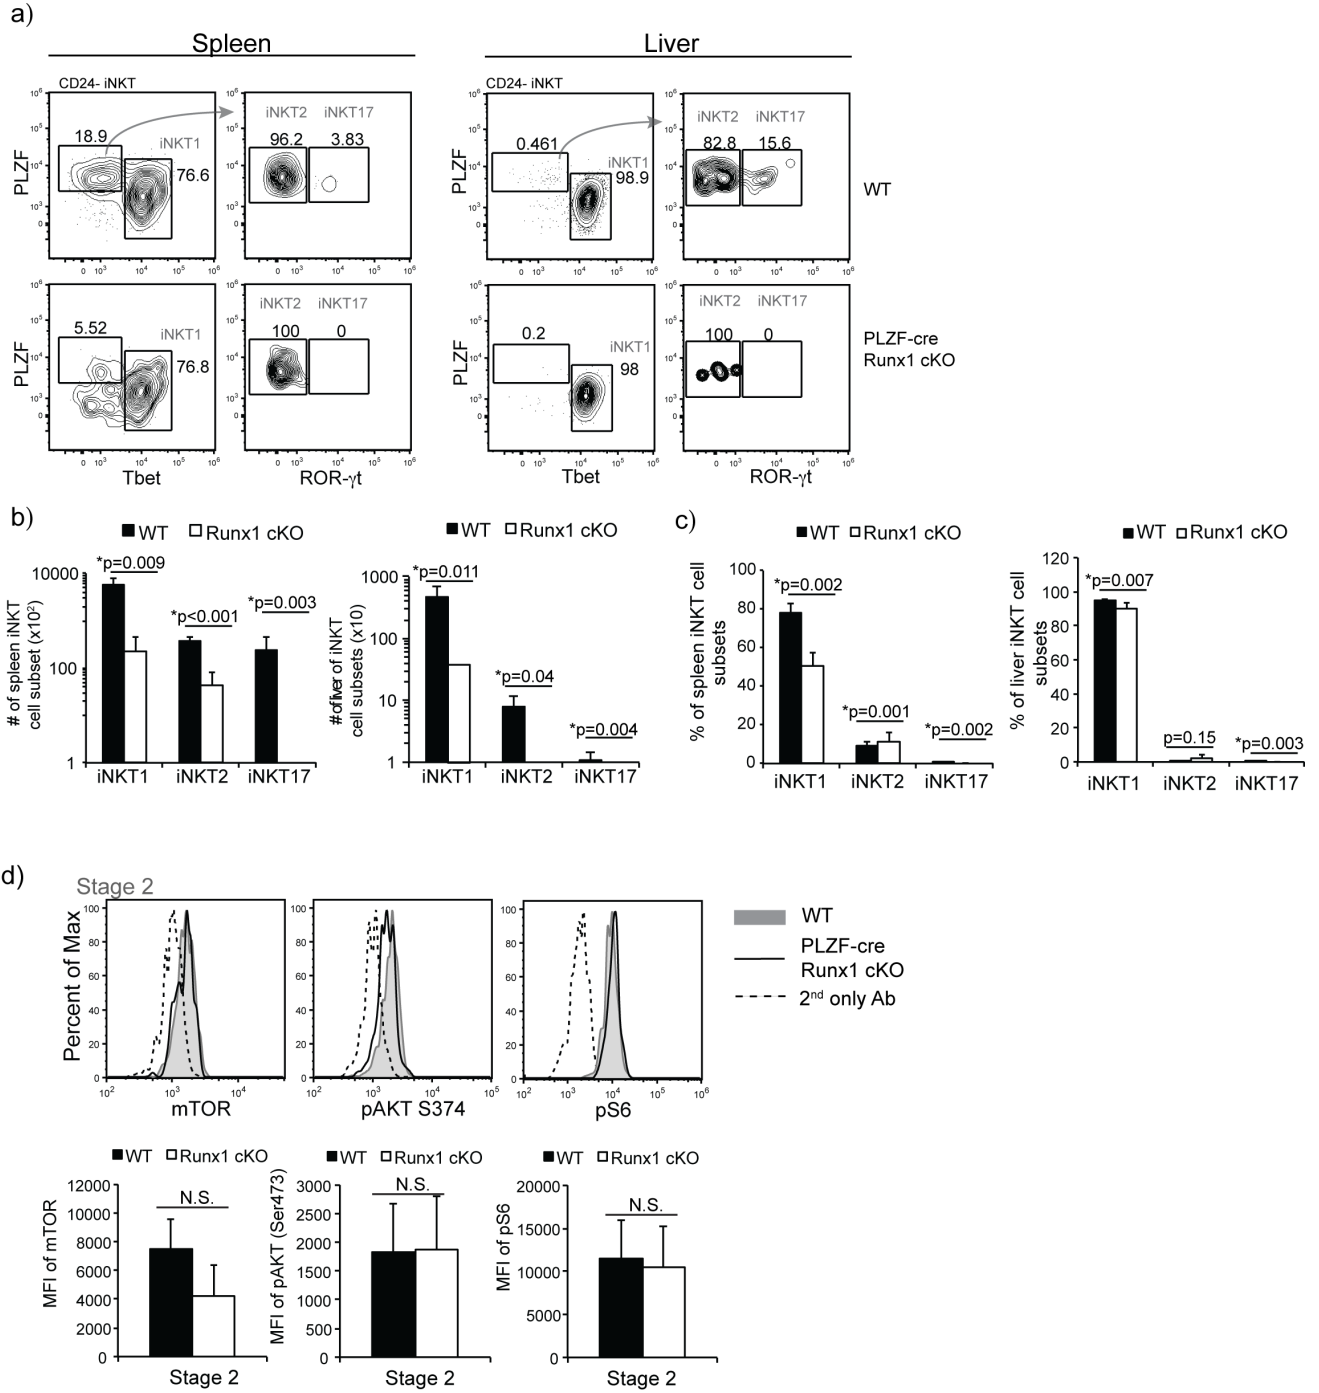

**Supplemental Figure 2: Absence of peripheral iNKT17 cells in the spleen and liver of PLZF-cre Runx1 cKO mice.**

(a) FACS analysis of splenic and liver iNKT1, iNKT2 and iNKT17 cells of WT (top) and PLZF-cre Runx1 cKO (bottom) mice. Gating for functional subsets were done as defined in Figure 4, using PLZF, Tbet and ROR- $\gamma$ t. Data is representative of at least 11 mice/genotype for spleen and 9 mice/genotype for liver. (b) Absolute number of iNKT cell subsets (iNKT1, iNKT2 and iNKT17) in spleen and liver of WT (black bars) and PLZF-cre Runx1 cKO (white bars) mice. Data is calculated from at least 11 mice/genotype for spleen and 9 mice/genotype for liver. (c) Frequency of iNKT cell subsets (iNKT1, iNKT2 and iNKT17) in spleen and liver of WT (black bars) and PLZF-cre Runx1 cKO (white bars) mice. Data is calculated from at least 11 mice/genotype for spleen and 9 mice/genotype for liver. (d) Expression of mTOR, pAKT (Ser374), and pS6 in Stage 2 iNKT cells of WT (grey filled), PLZF-cre Hdac3 cKO (black line) mice and Secondary antibody only control (dashed line). Data is representative of at least 4 mice/genotype from 4 independent experiments. Quantification of MFI for mTOR, pAKT (Ser374), and pS6 in Stage 2 iNKT cells of WT (black bar) and PLZF-cre Hdac3 cKO (white bar) mice. Data is calculated from at least 4 mice/genotype from 4 independent experiments. All statistical analysis was done using Student's *t-test*. Means  $\pm$  S.E.M.

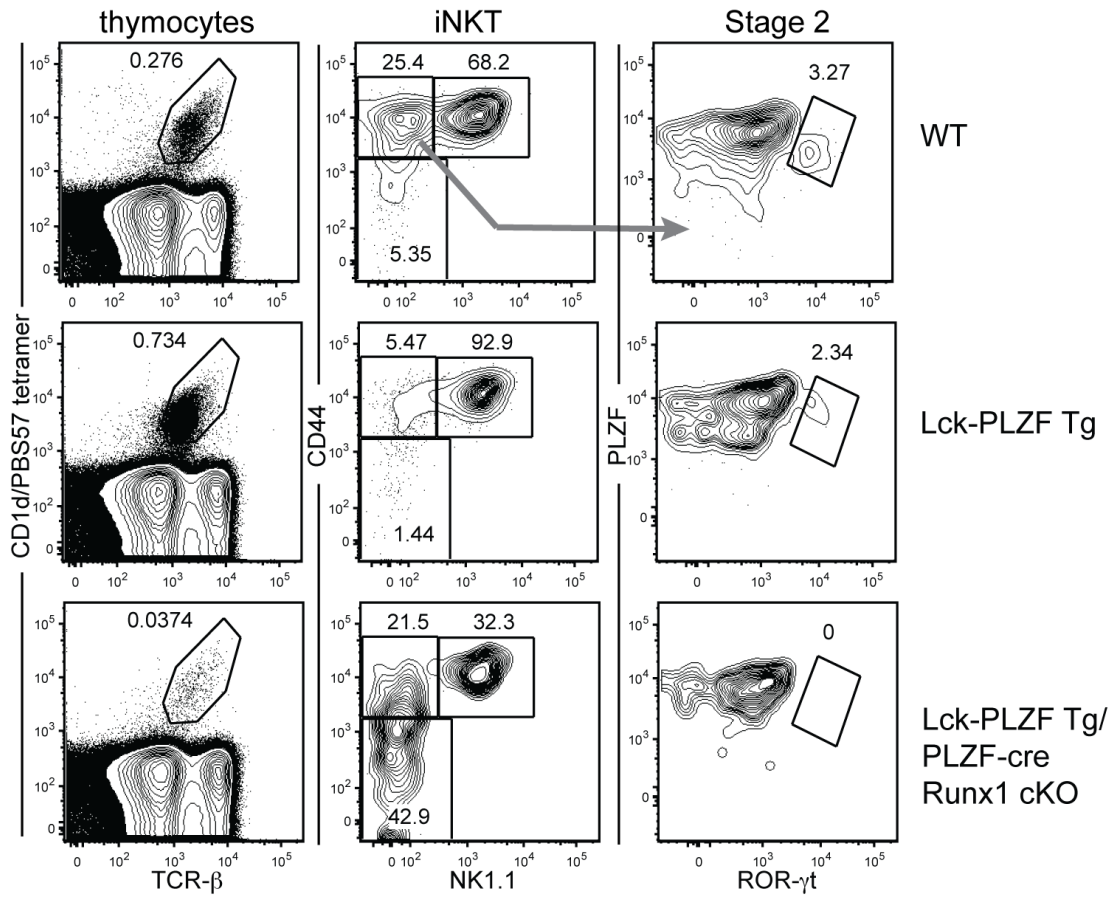

**Supplemental Figure 3: Ectopic expression of PLZF in Runx1-deficient iNKT cells does not rescue block in iNKT17 differentiation.** FACS analysis of iNKT cell development and ROR- $\gamma$ t expression in Stage 2 iNKT cells in WT, Lck-PLZF Tg and Lck-PLZF Tg/PLZF-cre Runx1 cKO mice. Analysis of iNKT cells was performed as described in Fig 1. Data is representative of 3 mice/genotype from 3 independent experiments.
